# Supplementary material
Source: publisher site journal article supplement (https://www.spandidos-publications.com/1533/downloadSupplementary)
Supplement: Supplementary file 1 [file downloadSupplementary]

## Sheet: ALL
Table SII. The identification of robust DEGs by RRA method
Name	P-value	adjP-value	log2-FC	Regulation
CA9	2.14312e-21	8.04571e-17	5.26519	up
ANGPTL4	6.39933e-21	2.40244e-16	4.49039	up
NDUFA4L2	2.44115e-20	9.16456e-16	4.72525	up
COL23A1	4.09557e-19	1.53756e-14	3.57344	up
NPTX2	1.5084e-18	5.66285e-14	3.53656	up
TNFAIP6	3.75331e-18	1.40907e-13	3.73622	up
FABP7	5.49866e-18	2.06431e-13	4.77027	up
NETO2	8.77823e-18	3.29552e-13	2.93857	up
ENO2	1.55512e-17	5.83822e-13	2.91592	up
IGFBP3	1.2173e-16	4.56998e-12	3.07878	up
ENPP3	2.11885e-16	7.95459e-12	3.77855	up
CYP2J2	1.89847e-15	7.12723e-11	3.4265	up
ESM1	2.14312e-15	8.04571e-11	2.6443	up
CP	2.87199e-15	1.0782e-10	2.65579	up
EGLN3	3.04006e-15	1.1413e-10	3.76272	up
SLC6A3	5.73233e-15	2.15203e-10	2.40191	up
INHBB	6.08595e-15	2.28479e-10	3.24781	up
SPAG4	1.417e-14	5.31971e-10	2.38712	up
LOX	3.73252e-14	1.40126e-09	2.16163	up
IDO1	4.0195e-14	1.509e-09	2.4058	up
HILPDA	4.93889e-14	1.85416e-09	2.39038	up
CDCA2	5.74544e-14	2.15695e-09	2.58856	up
CD36	7.53561e-14	2.82902e-09	2.11699	up
APOC1	8.31675e-14	3.12228e-09	3.1297	up
C3	1.5069e-13	5.65719e-09	2.56624	up
HK2	1.5069e-13	5.65719e-09	2.43789	up
ALDOC	2.00136e-13	7.51349e-09	1.98439	up
AHNAK2	3.34176e-13	1.25456e-08	2.63567	up
VEGFA	3.7027e-13	1.39007e-08	2.54004	up
TGFBI	4.30466e-13	1.61606e-08	2.18055	up
NOL3	5.35907e-13	2.0119e-08	2.38693	up
ANGPT2	6.50793e-13	2.44321e-08	2.28337	up
RGS5	6.62044e-13	2.48545e-08	2.06848	up
GAL3ST1	6.7747e-13	2.54336e-08	2.16039	up
ZNF395	8.48912e-13	3.18698e-08	2.13767	up
VWF	9.68112e-13	3.63448e-08	2.79743	up
CXCR4	9.68112e-13	3.63448e-08	2.0887	up
CDH13	9.68112e-13	3.63448e-08	1.71244	up
NNMT	1.03275e-12	3.87715e-08	3.09438	up
C5orf46	1.14366e-12	4.29354e-08	2.64121	up
CTHRC1	1.19767e-12	4.4963e-08	1.73386	up
SCGN	2.5255e-12	9.48122e-08	2.2468	up
EHD2	2.71783e-12	1.02033e-07	1.66993	up
RGS1	2.92222e-12	1.09706e-07	1.94173	up
BTN3A2	3.74131e-12	1.40456e-07	1.47191	up
CD70	4.51175e-12	1.6938e-07	3.7288	up
PLA2G7	4.90328e-12	1.84079e-07	2.39409	up
PYGL	5.32272e-12	1.99826e-07	1.56771	up
STC2	5.4101e-12	2.03106e-07	2.75016	up
SLC15A4	5.49866e-12	2.06431e-07	1.62967	up
LAPTM5	7.08877e-12	2.66126e-07	1.79805	up
PPP1R3C	7.19967e-12	2.7029e-07	1.86817	up
CCND1	7.42582e-12	2.7878e-07	2.13662	up
BIRC3	8.64737e-12	3.2464e-07	1.75921	up
CSPG4	1.0032e-11	3.76621e-07	1.76904	up
PNMA2	1.12684e-11	4.23039e-07	1.77331	up
TYROBP	1.12684e-11	4.23039e-07	1.83203	up
STAMBPL1	1.19327e-11	4.47978e-07	1.62489	up
ADM	1.24521e-11	4.67476e-07	2.13374	up
KISS1R	1.26666e-11	4.75528e-07	1.65758	up
LPCAT1	1.78722e-11	6.70957e-07	1.58528	up
APOLD1	2.19464e-11	8.2391e-07	2.04542	up
FBXL16	2.46155e-11	9.24115e-07	1.65601	up
PPFIA4	2.6541e-11	9.96402e-07	1.57074	up
SEMA5B	2.75498e-11	1.03428e-06	2.53056	up
P2RX7	3.00286e-11	1.12734e-06	1.62712	up
GAS2L3	3.08429e-11	1.1579e-06	1.89866	up
TMEM45A	3.3028e-11	1.23994e-06	1.72376	up
NUSAP1	3.51261e-11	1.3187e-06	1.38954	up
PLOD2	3.55464e-11	1.33448e-06	1.64337	up
PLK2	3.72695e-11	1.39917e-06	1.83889	up
VCAN	3.99844e-11	1.50109e-06	1.71853	up
SCD	4.03362e-11	1.5143e-06	2.35825	up
GZMA	4.04525e-11	1.51867e-06	1.53702	up
SAP30	4.85866e-11	1.82404e-06	1.68402	up
DIRAS2	4.96929e-11	1.86557e-06	2.02664	up
ITGB2	5.02539e-11	1.88663e-06	1.66555	up
TRIB3	5.08201e-11	1.90789e-06	2.10915	up
C10orf10	5.20343e-11	1.95347e-06	1.80619	up
FCGR1B	6.5391e-11	2.45491e-06	1.36536	up
NMB	6.7525e-11	2.53502e-06	1.66978	up
PCDH17	7.50625e-11	2.818e-06	1.76819	up
HLX	8.41508e-11	3.15919e-06	1.32423	up
TAP1	9.0398e-11	3.39372e-06	1.70327	up
PDGFD	1.03027e-10	3.86784e-06	1.3895	up
CD247	1.06141e-10	3.98474e-06	1.47853	up
DDIT4	1.2173e-10	4.56998e-06	1.65273	up
EDN1	1.24105e-10	4.65915e-06	2.19519	up
C1QC	1.2542e-10	4.70852e-06	1.77841	up
CAV1	1.28717e-10	4.83231e-06	1.81416	up
COL4A1	1.4318e-10	5.37528e-06	1.56019	up
ITGA5	1.47274e-10	5.52897e-06	1.57078	up
IRX3	1.53792e-10	5.77365e-06	1.53961	up
ST8SIA4	1.57672e-10	5.91931e-06	1.54607	up
CCL20	1.61629e-10	6.06789e-06	1.49052	up
PSMB9	1.77137e-10	6.65009e-06	1.21986	up
BHLHE41	1.91614e-10	7.19358e-06	2.2492	up
CD2	1.97362e-10	7.40935e-06	1.44987	up
CD8A	1.97362e-10	7.40935e-06	1.62759	up
C1QB	2.20645e-10	8.28345e-06	1.82108	up
PFKP	2.41521e-10	9.0672e-06	2.25231	up
SLC17A4	2.47845e-10	9.30458e-06	1.94918	up
TLR3	2.52136e-10	9.46569e-06	1.5565	up
NKG7	2.52136e-10	9.46569e-06	1.42732	up
VIM	2.56489e-10	9.62913e-06	1.7629	up
ANXA4	2.58689e-10	9.71172e-06	1.32209	up
CD27	2.58689e-10	9.71172e-06	1.15341	up
MIR210HG	2.59021e-10	9.72417e-06	1.9135	up
GRAMD4	3.06109e-10	1.1492e-05	1.3582	up
SCARB1	3.32407e-10	1.24792e-05	2.62213	up
TYMP	3.32407e-10	1.24792e-05	1.6048	up
HEY1	3.40654e-10	1.27888e-05	1.34234	up
CXCL9	3.74451e-10	1.40576e-05	1.58582	up
SCN4B	4.57218e-10	1.71649e-05	1.08553	up
PTHLH	5.13102e-10	1.92629e-05	1.98235	up
CXCL10	5.17549e-10	1.94298e-05	1.61966	up
HSPA6	5.36994e-10	2.01598e-05	1.31737	up
C4orf47	5.45162e-10	2.04665e-05	1.22258	up
SLC15A3	5.53432e-10	2.07769e-05	1.49702	up
MCAM	5.57606e-10	2.09336e-05	1.33042	up
HLA-F	5.83206e-10	2.18947e-05	1.56008	up
KCNK3	5.83206e-10	2.18947e-05	1.50631	up
IFI16	6.61116e-10	2.48196e-05	1.45392	up
RTP4	6.95623e-10	2.61151e-05	1.08828	up
PROCR	7.05753e-10	2.64954e-05	1.1945	up
KCNJ2	7.14381e-10	2.68193e-05	1.5123	up
ANGPTL2	7.21179e-10	2.70745e-05	1.72855	up
P2RY8	7.47513e-10	2.80631e-05	1.38129	up
NLGN1	7.63694e-10	2.86706e-05	1.45746	up
SERPINE1	7.9662e-10	2.99067e-05	1.42544	up
HLA-DPB1	8.02589e-10	3.01308e-05	1.23239	up
PGF	8.31369e-10	3.12113e-05	2.19948	up
CORO1A	8.55009e-10	3.20987e-05	1.26935	up
CCL28	9.42206e-10	3.53723e-05	1.43763	up
RUNX3	9.68437e-10	3.63571e-05	1.39734	up
GBP5	9.81779e-10	3.6858e-05	1.48319	up
SCG5	9.88508e-10	3.71106e-05	1.16549	up
IL2RB	1.00208e-09	3.76201e-05	1.79589	up
PPP1R13L	1.00208e-09	3.76201e-05	1.2605	up
PAG1	1.04373e-09	3.91837e-05	1.01176	up
PXDN	1.07953e-09	4.05278e-05	1.28965	up
ACLY	1.1015e-09	4.13526e-05	1.22145	up
PRKCDBP	1.16525e-09	4.37459e-05	1.43991	up
COL8A1	1.16965e-09	4.39111e-05	1.51338	up
DDB2	1.22461e-09	4.59743e-05	1.48491	up
PECAM1	1.23315e-09	4.62949e-05	1.49295	up
OLFML2A	1.23315e-09	4.62949e-05	1.76241	up
GIT2	1.25769e-09	4.72162e-05	1.06762	up
DOC2A	1.27427e-09	4.78388e-05	1.99103	up
GNLY	1.31653e-09	4.94253e-05	1.11279	up
CD40	1.32513e-09	4.97479e-05	1.07103	up
SHMT2	1.36878e-09	5.13869e-05	1.28739	up
COL4A2	1.44113e-09	5.41027e-05	1.39393	up
FAM57A	1.4597e-09	5.48001e-05	1.30609	up
PNCK	1.46328e-09	5.49343e-05	2.64087	up
IKBIP	1.47847e-09	5.55049e-05	1.1269	up
LY86	1.55874e-09	5.85183e-05	1.56339	up
CAV2	1.58337e-09	5.94429e-05	1.59746	up
ITGA4	1.79623e-09	6.74341e-05	1.11363	up
FAP	1.82979e-09	6.86939e-05	1.16942	up
ITGAL	1.92183e-09	7.21495e-05	1.19224	up
HES4	1.93283e-09	7.25623e-05	1.29028	up
HMOX1	1.9813e-09	7.43819e-05	1.73801	up
TNFSF13B	1.9813e-09	7.43819e-05	1.31179	up
PGBD5	1.99337e-09	7.48352e-05	1.25786	up
FPR3	2.05192e-09	7.70332e-05	1.48058	up
TMSB10	2.05467e-09	7.71365e-05	1.27712	up
RNASET2	2.0922e-09	7.85453e-05	2.37843	up
FKBP10	2.10483e-09	7.90197e-05	1.17657	up
COL5A2	2.13029e-09	7.99755e-05	1.53362	up
LAMA4	2.13029e-09	7.99755e-05	1.49797	up
MS4A7	2.24768e-09	8.43823e-05	1.18574	up
FUT11	2.28851e-09	8.59154e-05	1.01344	up
PLEK	2.39934e-09	9.0076e-05	1.29594	up
TYMS	2.4135e-09	9.06077e-05	1.40844	up
GZMK	2.6626e-09	9.99593e-05	1.22966	up
CASP1	2.68059e-09	0.000100635	1.1873	up
HSD3B7	2.72741e-09	0.000102393	1.03953	up
TLR7	2.83932e-09	0.000106594	1.18689	up
CCL5	2.89563e-09	0.000108708	1.49105	up
OLFML2B	2.90497e-09	0.000109058	1.53476	up
PHKA2	3.19825e-09	0.000120069	1.79879	up
LCP1	3.25249e-09	0.000122105	1.48586	up
TREM2	3.30748e-09	0.00012417	2.06002	up
RAC2	3.34458e-09	0.000125562	1.39897	up
FXYD5	3.38201e-09	0.000126968	1.38033	up
FLT1	3.59762e-09	0.000135062	1.34379	up
ADAP2	3.63398e-09	0.000136427	1.2911	up
FCER1G	3.67542e-09	0.000137983	1.28446	up
TIMP1	3.69429e-09	0.000138691	1.53153	up
COL1A1	3.71458e-09	0.000139453	1.98469	up
LGALS9	3.77601e-09	0.000141759	1.08156	up
MS4A6A	3.83828e-09	0.000144097	1.51949	up
AFAP1L1	3.92263e-09	0.000147263	1.08983	up
FOXJ3	4.03024e-09	0.000151303	1.1833	up
CSF1R	4.05206e-09	0.000152122	1.2848	up
SLC41A2	4.23014e-09	0.000158808	1.15941	up
HLA-B	4.27567e-09	0.000160517	1.38147	up
FYB	4.29858e-09	0.000161377	1.03071	up
DGCR5	4.36795e-09	0.000163981	2.78146	up
ANO1	4.39127e-09	0.000164857	1.04175	up
ISG20	4.4147e-09	0.000165737	1.27055	up
PDK1	4.48614e-09	0.000168419	1.12515	up
C1orf162	4.51149e-09	0.00016937	1.41166	up
HLA-G	4.93136e-09	0.000185133	1.4891	up
TRIM22	4.95717e-09	0.000186102	1.16465	up
TCF4	5.00912e-09	0.000188052	1.1367	up
SPARC	5.46933e-09	0.000205329	1.29299	up
JAG2	5.49746e-09	0.000206386	1.30971	up
FSCN1	5.6112e-09	0.000210656	1.26261	up
ADCY7	5.63993e-09	0.000211734	1.03045	up
GZMB	5.69778e-09	0.000213906	1.02426	up
STMN3	5.75612e-09	0.000216096	1.24599	up
PABPC4L	5.75612e-09	0.000216096	1.0432	up
MLKL	5.84456e-09	0.000219416	1.07406	up
MALL	6.05533e-09	0.000227329	1.27446	up
ERGIC1	6.17859e-09	0.000231957	1.02172	up
PLA1A	6.20973e-09	0.000233126	1.17682	up
ICAM1	6.30393e-09	0.000236662	1.0772	up
CD52	6.55297e-09	0.000246011	1.21182	up
AXL	6.59372e-09	0.000247542	1.1268	up
PMEPA1	6.69275e-09	0.000251259	1.17318	up
RHBDF2	6.86055e-09	0.000257559	1.28413	up
PSMB10	6.9973e-09	0.000262693	1.07506	up
SLFN13	7.02898e-09	0.000263882	1.667	up
CD1D	7.10135e-09	0.000266599	1.21581	up
IL20RB	7.20668e-09	0.000270553	1.9428	up
ATHL1	7.24208e-09	0.000271882	1.5953	up
FAM26F	7.97326e-09	0.000299332	1.29312	up
TGFA	8.01964e-09	0.000301073	1.74375	up
DOCK2	8.05834e-09	0.000302526	1.21243	up
FCGR2A	8.1362e-09	0.000305449	1.00675	up
CD300A	8.24762e-09	0.000309632	1.46011	up
GJC1	8.52948e-09	0.000320214	1.47344	up
LHFPL2	8.62512e-09	0.000323804	1.54229	up
ARHGAP9	8.82367e-09	0.000331258	1.19942	up
IL10RA	9.07757e-09	0.00034079	1.13077	up
FABP5	9.11627e-09	0.000342243	1.2393	up
CTSS	9.42555e-09	0.000353854	1.08755	up
CEP55	9.55887e-09	0.000358859	1.4175	up
CDH6	9.60366e-09	0.000360541	1.07744	up
SLC43A3	9.69377e-09	0.000363923	1.08054	up
PLVAP	1.06114e-08	0.000398375	1.33644	up
CYBB	1.07816e-08	0.000404764	1.15526	up
UHRF1	1.16495e-08	0.000437346	1.0679	up
LDHA	1.17023e-08	0.000439329	1.3758	up
BTN3A1	1.17023e-08	0.000439329	1.04165	up
CD37	1.17553e-08	0.000441319	1.01164	up
LGALS1	1.19156e-08	0.000447335	1.31131	up
SLC1A4	1.21321e-08	0.000455462	1.0027	up
TMEM140	1.21321e-08	0.000455462	1.11911	up
VAV1	1.24073e-08	0.000465793	1.02876	up
HAVCR1	1.33512e-08	0.00050123	1.16922	up
C1QA	1.3488e-08	0.000506365	1.29108	up
PYCARD	1.3488e-08	0.000506365	1.0955	up
HOXA4	1.38017e-08	0.000518144	1.03943	up
TNFSF9	1.45465e-08	0.000546103	1.09246	up
MSC	1.45465e-08	0.000546103	1.53046	up
SH2B3	1.47378e-08	0.000553286	1.12587	up
PARVG	1.57262e-08	0.000590393	1.24232	up
DYSF	1.62755e-08	0.000611016	1.36303	up
TEX11	1.63453e-08	0.000613635	1.56632	up
KCNE4	1.65561e-08	0.00062155	1.07208	up
SIPA1L2	1.72753e-08	0.00064855	1.01951	up
CD300LF	1.8249e-08	0.000685106	1.14825	up
QRFPR	1.88307e-08	0.000706942	1.65494	up
LYZ	2.03289e-08	0.000763189	1.25398	up
LST1	2.11872e-08	0.000795408	1.01382	up
SLC2A1	2.29829e-08	0.000862825	1.65625	up
SEL1L3	2.3076e-08	0.000866317	1.3715	up
CLEC14A	2.31693e-08	0.000869821	1.19482	up
LMNB1	2.37359e-08	0.000891093	1.19608	up
ENTPD1	2.37822e-08	0.000892832	1.18975	up
SIRPA	2.48047e-08	0.000931218	1.26813	up
GBP4	2.53036e-08	0.000949948	1.05175	up
HAPLN1	2.53163e-08	0.000950426	3.3002	up
NUPR1	2.57087e-08	0.000965157	1.2026	up
ABCA1	2.68508e-08	0.00100803	1.31056	up
COX4I2	2.70629e-08	0.00101599	1.15519	up
GABRD	2.72764e-08	0.00102401	2.05959	up
OSMR	2.77076e-08	0.0010402	1.02093	up
GZMH	2.78163e-08	0.00104428	1.11869	up
EOMES	2.81804e-08	0.00105795	1.33847	up
GJA1	2.83651e-08	0.00106488	1.29325	up
CHST15	2.86787e-08	0.00107666	1.24542	up
GBP2	2.98344e-08	0.00112004	1.33947	up
HLA-DQB1	3.02162e-08	0.00113438	1.28687	up
TRPV2	3.11267e-08	0.00116856	1.21683	up
KLHL6	3.13666e-08	0.00117756	1.26441	up
HCLS1	3.20923e-08	0.00120481	1.25766	up
PFKFB4	3.22184e-08	0.00120954	1.91999	up
HLA-DPA1	3.23678e-08	0.00121515	1.33661	up
HIST1H2BK	3.34886e-08	0.00125723	1.20959	up
RAB42	3.66933e-08	0.00137754	2.35403	up
PHLDA3	3.71863e-08	0.00139605	1.39938	up
APBB1IP	3.74645e-08	0.00140649	1.56305	up
LOC100129034	3.91704e-08	0.00147053	1.33139	up
GMFG	4.055e-08	0.00152233	1.0264	up
HPCAL1	4.21572e-08	0.00158267	1.12727	up
ALOX5	4.32673e-08	0.00162434	1.13516	up
SLC2A3	4.5139e-08	0.00169461	1.13705	up
PLEKHO1	4.53992e-08	0.00170438	1.0259	up
CPE	4.56596e-08	0.00171415	1.19423	up
PLIN2	4.58244e-08	0.00172034	2.23924	up
ERO1L	4.68665e-08	0.00175946	1.14723	up
BTBD16	4.72391e-08	0.00177345	2.42278	up
BNIP3	4.73299e-08	0.00177686	1.08879	up
PLXND1	4.8184e-08	0.00180892	1.10817	up
SLC6A8	5.06439e-08	0.00190127	1.0139	up
CDH4	5.08236e-08	0.00190802	2.73966	up
ABCG1	5.23031e-08	0.00196356	1.01136	up
SSPN	5.23031e-08	0.00196356	1.08073	up
LAG3	5.37708e-08	0.00201867	1.51097	up
C19orf33	5.37708e-08	0.00201867	1.05332	up
PLXDC1	6.56771e-08	0.00246565	1.09494	up
BARX2	6.56771e-08	0.00246565	1.3764	up
GIMAP4	6.59002e-08	0.00247402	1.11027	up
ERV3-2	6.63074e-08	0.00248931	1.59682	up
GPR4	6.72519e-08	0.00252477	1.27834	up
TOP2A	6.76681e-08	0.0025404	1.33682	up
IFI44L	7.00248e-08	0.00262887	1.03694	up
APLN	7.1208e-08	0.00267329	1.88188	up
MYOF	7.16992e-08	0.00269173	1.15887	up
RNASE6	7.27487e-08	0.00273113	1.0729	up
IL32	7.28923e-08	0.00273652	1.19335	up
IL4I1	8.04921e-08	0.00302184	1.45255	up
HLA-E	8.04921e-08	0.00302184	1.10561	up
CDCA7L	8.27582e-08	0.00310691	1.07964	up
HLA-DRB4	8.4808e-08	0.00318386	1.13165	up
CD53	8.61956e-08	0.00323596	1.14899	up
ARHGDIB	8.81593e-08	0.00330968	1.2555	up
CD3D	9.28249e-08	0.00348483	1.18195	up
SLC1A3	9.43208e-08	0.00354099	1.53145	up
IFI27	9.71174e-08	0.00364598	1.10994	up
DUSP1	1.02105e-07	0.00383324	1.03086	up
S100A10	1.05036e-07	0.00394325	1.05927	up
ANO4	1.06073e-07	0.00398218	1.97324	up
PLOD3	1.08036e-07	0.00405587	1.22877	up
SLC38A1	1.10422e-07	0.00414547	1.0738	up
KRBA1	1.134e-07	0.00425728	2.41133	up
SPINK13	1.22721e-07	0.0046072	1.92371	up
MTCP1	1.22997e-07	0.00461757	1.61518	up
CST7	1.26781e-07	0.00475961	1.05914	up
PRELID2	1.27606e-07	0.00479057	1.26984	up
TNFRSF14	1.28742e-07	0.00483325	1.14423	up
ADAMDEC1	1.31897e-07	0.00495167	1.66379	up
CD163	1.34491e-07	0.00504908	1.02096	up
PRF1	1.42293e-07	0.00534197	1.01365	up
C6orf223	1.43877e-07	0.00540141	1.23781	up
SLC17A2	1.50865e-07	0.00566378	1.46175	up
SERPINA1	1.5721e-07	0.00590198	1.23553	up
VWCE	1.64732e-07	0.00618438	1.89993	up
HLA-DMA	1.65295e-07	0.00620552	1.05916	up
LAMC1	1.67629e-07	0.00629314	1.188	up
SLCO2B1	1.73551e-07	0.00651545	1.06483	up
TRIM9	1.7359e-07	0.0065169	1.02519	up
HLA-DRA	1.78106e-07	0.00668644	1.08972	up
CCND2	1.81197e-07	0.0068025	1.17861	up
EMR2	1.8486e-07	0.00694002	1.27416	up
FN1	1.92478e-07	0.00722602	1.07143	up
ENPP2	1.94564e-07	0.00730431	1.08784	up
HLA-DQA1	1.94625e-07	0.0073066	1.02561	up
CDK18	2.02868e-07	0.00761608	1.0553	up
MELK	2.06418e-07	0.00774933	1.3365	up
APOBEC3G	2.1465e-07	0.00805838	1.23844	up
ABCC3	2.30665e-07	0.00865961	2.01279	up
NCAPG	2.34615e-07	0.0088079	1.38058	up
CD84	2.38385e-07	0.00894944	1.20124	up
CD74	2.4699e-07	0.00927251	1.10528	up
MARCKS	2.49012e-07	0.00934843	1.09415	up
POU5F1P4	2.65723e-07	0.00997576	1.14341	up
DIAPH2	2.7936e-07	0.0104877	1.02777	up
LY96	2.80909e-07	0.0105459	1.08775	up
CHSY3	2.84047e-07	0.0106637	1.21459	up
MYO1G	2.8556e-07	0.0107205	1.24606	up
EMP3	2.8556e-07	0.0107205	1.0994	up
TBC1D10C	2.89372e-07	0.0108636	1.21417	up
LOC154761	2.90348e-07	0.0109002	1.25964	up
CD96	3.06641e-07	0.0115119	1.13153	up
TNFRSF1B	3.09072e-07	0.0116032	1.04331	up
KIAA0101	3.1336e-07	0.0117641	1.04585	up
NEK6	3.15607e-07	0.0118485	1.02463	up
SOX11	3.35908e-07	0.0126107	1.71593	up
DTL	3.36009e-07	0.0126145	1.23887	up
TMEM44	3.47351e-07	0.0130402	1.26471	up
APOBEC3C	3.48244e-07	0.0130738	1.10436	up
NCKAP1L	3.48244e-07	0.0130738	1.25015	up
TPSAB1	4.294e-07	0.0161205	1.14407	up
LOC643733	4.48931e-07	0.0168538	1.11113	up
PRIMA1	4.6863e-07	0.0175933	1.09809	up
BTK	4.71496e-07	0.0177009	1.19192	up
TMCC1	4.7612e-07	0.0178745	1.05435	up
HCG27	4.84304e-07	0.0181817	1.26083	up
ADA	4.88703e-07	0.0183469	1.02393	up
LGI4	5.08334e-07	0.0190839	1.95918	up
C16orf13	5.2448e-07	0.01969	1.02591	up
ARHGAP22	5.32075e-07	0.0199752	1.44458	up
ANLN	5.67396e-07	0.0213012	1.30195	up
SPI1	5.72791e-07	0.0215037	1.02565	up
LPAR5	6.18955e-07	0.0232368	1.1941	up
TMEM2	6.27862e-07	0.0235712	1.19343	up
MYEOV	6.30818e-07	0.0236822	1.43171	up
APOB	6.5293e-07	0.0245123	1.24819	up
RIMKLA	6.72811e-07	0.0252587	1.57619	up
CXorf36	6.79639e-07	0.025515	1.16533	up
F12	7.0438e-07	0.0264438	1.4414	up
TNFRSF4	7.47258e-07	0.0280535	1.41753	up
GBP1	7.47258e-07	0.0280535	1.0031	up
SDS	7.47258e-07	0.0280535	1.23762	up
SEZ6L2	7.55747e-07	0.0283723	1.12897	up
HLA-DMB	7.79284e-07	0.0292559	1.07728	up
CDH5	7.93406e-07	0.0297861	1.03903	up
HSPB8	8.48194e-07	0.0318429	1.07172	up
HLA-DQB2	8.51951e-07	0.0319839	1.2278	up
TMEM155	8.62154e-07	0.032367	1.88462	up
COL5A3	8.77497e-07	0.032943	1.31301	up
PTGS1	8.94162e-07	0.0335686	1.04048	up
SCG2	9.02916e-07	0.0338973	1.60423	up
LSP1	9.05959e-07	0.0340115	1.04	up
HSF4	9.28946e-07	0.0348745	2.44201	up
ADORA3	9.39276e-07	0.0352623	1.1012	up
FSTL3	9.4733e-07	0.0355647	1.15282	up
VASH1	9.92059e-07	0.0372439	1.55396	up
AIM2	1.01299e-06	0.0380297	1.22509	up
RAB37	1.04411e-06	0.0391981	1.04749	up
SLC29A4	1.05733e-06	0.0396944	1.43888	up
ASPM	1.07547e-06	0.0403753	1.5261	up
MFNG	1.13882e-06	0.0427537	1.04496	up
CCL18	1.29508e-06	0.0486199	1.14511	up
KNG1	1.83807e-19	6.90049e-15	-5.14032	down
SERPINA5	2.31012e-17	8.67264e-13	-3.72602	down
CALB1	2.84998e-17	1.06994e-12	-3.54846	down
UMOD	3.34863e-17	1.25714e-12	-5.15938	down
FXYD4	9.99895e-17	3.75381e-12	-3.71649	down
SFRP1	2.52136e-16	9.46569e-12	-4.03715	down
UPP2	5.20966e-16	1.95581e-11	-3.14208	down
FGF9	9.95274e-16	3.73646e-11	-3.45132	down
EGF	1.13894e-15	4.27582e-11	-3.22171	down
NPHS2	1.57539e-15	5.91433e-11	-3.56516	down
RALYL	2.01771e-15	7.57487e-11	-3.03669	down
SLC47A2	2.559e-15	9.607e-11	-3.72977	down
DIO1	3.10551e-15	1.16587e-10	-3.34701	down
PCP4	7.06652e-15	2.65291e-10	-2.76226	down
ATP6V0A4	8.30301e-15	3.11712e-10	-3.87078	down
HPD	1.1862e-14	4.45322e-10	-3.46003	down
SH3GL2	1.417e-14	5.31971e-10	-3.02409	down
SLC12A3	1.68408e-14	6.32236e-10	-3.31065	down
CLCNKB	2.74913e-14	1.03208e-09	-3.23646	down
ERP27	3.08883e-14	1.15961e-09	-2.90933	down
MAL	3.73252e-14	1.40126e-09	-3.5479	down
SLC22A8	4.93889e-14	1.85416e-09	-2.66636	down
DAO	6.36976e-14	2.39133e-09	-2.62969	down
PVALB	6.59002e-14	2.47402e-09	-2.54606	down
AFM	7.95343e-14	2.98588e-09	-2.51651	down
KCNJ1	8.31675e-14	3.12228e-09	-3.1313	down
CRYAA	1.04051e-13	3.90629e-09	-3.40644	down
GPC5	1.25269e-13	4.70285e-09	-2.85888	down
DPEP1	1.54464e-13	5.79889e-09	-3.18586	down
ENPP6	1.83807e-13	6.90049e-09	-2.71707	down
ACSF2	2.23772e-13	8.40084e-09	-2.70482	down
PPP1R1A	2.30031e-13	8.63581e-09	-2.38221	down
SOST	3.16443e-13	1.18799e-08	-3.11389	down
NPHS1	3.34176e-13	1.25456e-08	-2.59608	down
GLDC	3.42912e-13	1.28736e-08	-2.64992	down
TMEM213	3.44672e-13	1.29397e-08	-1.97422	down
TFCP2L1	3.89501e-13	1.46226e-08	-3.51252	down
CLDN8	4.0717e-13	1.5286e-08	-2.22385	down
RAB25	4.19903e-13	1.5764e-08	-2.50627	down
SLC34A1	4.19903e-13	1.5764e-08	-3.29267	down
SOSTDC1	4.7496e-13	1.7831e-08	-2.35025	down
VTCN1	8.48912e-13	3.18698e-08	-3.38756	down
RHCG	9.26922e-13	3.47985e-08	-2.40146	down
FAM151A	1.06945e-12	4.01493e-08	-2.54866	down
TSPAN8	1.14846e-12	4.31155e-08	-3.56395	down
HPGD	1.17285e-12	4.40312e-08	-2.17737	down
HEPACAM2	1.48282e-12	5.56681e-08	-3.24915	down
AGPAT9	1.65845e-12	6.22616e-08	-2.67866	down
SLC12A1	1.78646e-12	6.70673e-08	-3.50177	down
PSAT1	1.90203e-12	7.14059e-08	-2.28526	down
ACPP	2.17472e-12	8.16432e-08	-3.11954	down
PTH1R	2.17472e-12	8.16432e-08	-2.78577	down
FABP1	2.84485e-12	1.06801e-07	-2.36973	down
FBP1	2.92222e-12	1.09706e-07	-2.46316	down
ATP6V0D2	3.00638e-12	1.12866e-07	-3.0629	down
MUC15	3.00638e-12	1.12866e-07	-2.98477	down
PLG	3.00638e-12	1.12866e-07	-2.8476	down
ALDH6A1	3.02911e-12	1.13719e-07	-2.58774	down
TYRP1	3.92776e-12	1.47456e-07	-2.44285	down
WNK4	4.07664e-12	1.53045e-07	-2.11922	down
G6PC	4.35412e-12	1.63462e-07	-2.44371	down
TCEAL2	4.5879e-12	1.72239e-07	-2.19828	down
C7	5.23653e-12	1.9659e-07	-2.83807	down
S100A2	5.3178e-12	1.99641e-07	-3.41243	down
HRG	5.85974e-12	2.19986e-07	-3.23673	down
DMRT2	6.4528e-12	2.42251e-07	-3.6605	down
DCN	8.51815e-12	3.19788e-07	-3.11822	down
TMPRSS2	1.04817e-11	3.93503e-07	-2.97164	down
CHGB	1.04817e-11	3.93503e-07	-2.32468	down
LPPR1	1.26293e-11	4.7413e-07	-3.21033	down
TCF21	1.28087e-11	4.80864e-07	-1.97545	down
SLC22A6	1.30118e-11	4.88488e-07	-2.63392	down
ANXA9	1.41245e-11	5.30263e-07	-1.82932	down
XPNPEP2	1.5288e-11	5.73944e-07	-2.85013	down
MT1G	1.68677e-11	6.33247e-07	-3.16553	down
PAPPA	1.73267e-11	6.50478e-07	-1.7073	down
PROC	1.90158e-11	7.13892e-07	-2.32233	down
ALB	2.15815e-11	8.10211e-07	-2.50236	down
OGDHL	2.25176e-11	8.45355e-07	-2.27461	down
DNER	2.31012e-11	8.67264e-07	-2.53396	down
PDE1A	2.33977e-11	8.78395e-07	-1.99902	down
PRR15L	2.46155e-11	9.24115e-07	-2.72983	down
IYD	2.49717e-11	9.37486e-07	-2.69771	down
AIF1L	2.72101e-11	1.02152e-06	-2.33325	down
FUT3	2.824e-11	1.06019e-06	-2.06028	down
HAO2	2.8775e-11	1.08027e-06	-1.93158	down
SLIT2	2.89445e-11	1.08663e-06	-1.68937	down
MT1F	3.03975e-11	1.14118e-06	-2.54113	down
MIOX	3.53352e-11	1.32656e-06	-1.6656	down
EFHD1	3.63994e-11	1.36651e-06	-1.93983	down
DNAJC12	3.7711e-11	1.41575e-06	-1.82195	down
GSTM3	3.81568e-11	1.43248e-06	-2.26676	down
MTTP	4.04525e-11	1.51867e-06	-1.92759	down
ADH1C	4.59103e-11	1.72357e-06	-2.31943	down
TUBAL3	4.75009e-11	1.78328e-06	-2.54023	down
UCHL1	4.96929e-11	1.86557e-06	-2.49185	down
TUBB2B	5.04394e-11	1.8936e-06	-1.59053	down
MFSD4	5.25508e-11	1.97286e-06	-1.7906	down
IRX2	5.31385e-11	1.99493e-06	-3.0038	down
PLCL1	5.80404e-11	2.17895e-06	-1.63528	down
GATA3	5.9323e-11	2.2271e-06	-1.4977	down
PCK1	6.12911e-11	2.30099e-06	-2.13774	down
PROZ	6.33134e-11	2.37691e-06	-2.79557	down
SUCNR1	6.6096e-11	2.48137e-06	-1.60215	down
CRHBP	6.82839e-11	2.56351e-06	-2.40591	down
FAM3B	7.89251e-11	2.96301e-06	-2.62396	down
HSPA2	9.22523e-11	3.46333e-06	-1.62735	down
PHYHD1	9.31912e-11	3.49858e-06	-1.54763	down
CA10	9.89937e-11	3.71642e-06	-2.56859	down
PTGDS	1.01397e-10	3.80666e-06	-1.66586	down
IGFBP2	1.04056e-10	3.90648e-06	-1.49635	down
CYP27B1	1.12899e-10	4.23844e-06	-2.00807	down
PTPRO	1.20557e-10	4.52593e-06	-1.84893	down
RNF150	1.22913e-10	4.61438e-06	-1.98833	down
FMO5	1.24105e-10	4.65915e-06	-1.64035	down
CLIC5	1.31463e-10	4.9354e-06	-2.06305	down
ATP6V1G3	1.40732e-10	5.28335e-06	-1.55408	down
AP1M2	1.44534e-10	5.42611e-06	-1.4486	down
SCNN1G	1.53792e-10	5.77365e-06	-2.26614	down
ADH6	1.58671e-10	5.95682e-06	-1.67069	down
TMC4	1.60146e-10	6.01219e-06	-1.56572	down
RASL11B	1.6313e-10	6.12421e-06	-2.94037	down
ABAT	1.73941e-10	6.5301e-06	-1.45203	down
SLC4A9	1.77137e-10	6.65009e-06	-2.35337	down
CYP8B1	1.90417e-10	7.14863e-06	-1.86219	down
CYP4A11	1.91614e-10	7.19358e-06	-2.49043	down
ALDOB	2.10647e-10	7.90811e-06	-3.20956	down
C16orf89	2.15634e-10	8.09532e-06	-1.71341	down
SLC13A1	2.19474e-10	8.2395e-06	-1.91655	down
HS6ST2	2.20645e-10	8.28345e-06	-2.64197	down
ASS1	2.25314e-10	8.45872e-06	-2.57656	down
WDR72	2.41521e-10	9.0672e-06	-2.21723	down
HMGCS2	2.63137e-10	9.87868e-06	-1.9336	down
FCAMR	2.70889e-10	1.01697e-05	-1.63383	down
GPD1L	2.9118e-10	1.09315e-05	-1.533	down
SLC30A2	2.96088e-10	1.11157e-05	-1.88859	down
SORD	2.98567e-10	1.12088e-05	-1.5384	down
SLC22A7	3.03578e-10	1.13969e-05	-1.66848	down
SPINK1	3.21671e-10	1.20762e-05	-2.06409	down
GSTO2	3.21671e-10	1.20762e-05	-1.96736	down
SLC5A11	3.27003e-10	1.22763e-05	-1.88953	down
LDHD	3.27003e-10	1.22763e-05	-1.54499	down
TMEM45B	3.43441e-10	1.28935e-05	-2.00304	down
GPC3	3.46246e-10	1.29988e-05	-2.30722	down
DUSP9	3.54777e-10	1.33191e-05	-1.78448	down
ANK2	3.84491e-10	1.44346e-05	-1.54527	down
KLK1	4.03294e-10	1.51405e-05	-2.09053	down
GAS1	4.0973e-10	1.53821e-05	-2.1204	down
ACOX2	4.0973e-10	1.53821e-05	-1.9151	down
APOH	4.22858e-10	1.58749e-05	-1.80911	down
TFAP2B	4.23816e-10	1.59109e-05	-3.08569	down
PLCXD3	4.36334e-10	1.63808e-05	-2.30311	down
ABCB1	4.39758e-10	1.65094e-05	-1.51418	down
FOXC1	4.90103e-10	1.83994e-05	-1.45957	down
HADH	4.90103e-10	1.83994e-05	-1.86305	down
MCOLN3	5.01493e-10	1.8827e-05	-1.63782	down
SLC5A2	5.07491e-10	1.90522e-05	-1.59026	down
NELL1	5.53432e-10	2.07769e-05	-3.51086	down
PTPRD	5.78873e-10	2.1732e-05	-1.37091	down
HSD11B2	6.28047e-10	2.35782e-05	-2.22229	down
SLC16A9	6.39075e-10	2.39922e-05	-1.7488	down
NR3C2	6.61116e-10	2.48196e-05	-1.29766	down
BSPRY	7.21179e-10	2.70745e-05	-1.39303	down
PEPD	7.31618e-10	2.74664e-05	-1.80013	down
PRRG2	7.69152e-10	2.88755e-05	-1.95906	down
DEFB1	8.25654e-10	3.09967e-05	-1.72933	down
DCXR	8.49047e-10	3.18749e-05	-2.03118	down
AZGP1	8.86259e-10	3.32719e-05	-1.6592	down
CYP24A1	8.91516e-10	3.34693e-05	-1.78507	down
FMO4	8.91516e-10	3.34693e-05	-1.41277	down
FGF1	9.01952e-10	3.38611e-05	-1.70641	down
NPNT	9.48707e-10	3.56164e-05	-1.39628	down
CTXN3	9.65938e-10	3.62632e-05	-1.57638	down
FBLN5	9.95274e-10	3.73646e-05	-1.5963	down
GMPR	1.00892e-09	3.7877e-05	-1.37463	down
MT1E	1.01581e-09	3.81354e-05	-1.82547	down
FTCD	1.03567e-09	3.8881e-05	-2.01678	down
NDNF	1.07145e-09	4.02244e-05	-1.79138	down
PCK2	1.12698e-09	4.23089e-05	-1.64804	down
ALDH4A1	1.16965e-09	4.39111e-05	-1.89646	down
MT1M	1.20901e-09	4.53887e-05	-1.53461	down
GPR110	1.25769e-09	4.72162e-05	-3.34016	down
TNNC1	1.27427e-09	4.78388e-05	-1.89752	down
KCNJ10	1.28263e-09	4.81527e-05	-1.53251	down
IL17RB	1.34245e-09	5.03982e-05	-1.39796	down
MAN1C1	1.43191e-09	5.37569e-05	-1.8571	down
LRRC19	1.43191e-09	5.37569e-05	-1.7322	down
FREM1	1.44113e-09	5.41027e-05	-2.44906	down
CYP4F3	1.48669e-09	5.58134e-05	-1.17584	down
ASB9	1.53601e-09	5.76648e-05	-1.33387	down
AQP2	1.6715e-09	6.27515e-05	-3.12199	down
GP2	1.71122e-09	6.42426e-05	-2.66143	down
PPAPDC1A	1.73775e-09	6.52387e-05	-1.88698	down
TST	1.80736e-09	6.78519e-05	-1.66115	down
ANXA3	1.85245e-09	6.95446e-05	-2.05773	down
ACADSB	1.89847e-09	7.12723e-05	-1.3188	down
WT1	2.05467e-09	7.71365e-05	-1.55086	down
TYRO3	2.14312e-09	8.04571e-05	-1.46759	down
PIPOX	2.17681e-09	8.17217e-05	-1.66135	down
PRODH2	2.17681e-09	8.17217e-05	-1.89959	down
ATP6V1C2	2.24807e-09	8.43971e-05	-1.8087	down
CGN	2.27497e-09	8.54068e-05	-1.74963	down
KLHL3	2.28851e-09	8.59154e-05	-1.82336	down
APOM	2.34138e-09	8.79002e-05	-1.76221	down
MT1H	2.35727e-09	8.84966e-05	-2.13781	down
C1orf168	2.42773e-09	9.1142e-05	-1.64579	down
REEP6	2.55184e-09	9.58013e-05	-1.7198	down
C14orf37	2.69613e-09	0.000101218	-2.03428	down
CLDN19	2.77716e-09	0.00010426	-2.45832	down
LYPD6B	2.88844e-09	0.000108438	-1.77495	down
CDH3	2.92158e-09	0.000109682	-1.71908	down
KLK6	2.92158e-09	0.000109682	-1.38425	down
AQP11	3.14478e-09	0.000118061	-1.33281	down
FOLR3	3.23432e-09	0.000121423	-1.84425	down
SFXN2	3.32003e-09	0.000124641	-1.69577	down
CLDN10	3.40086e-09	0.000127675	-1.82219	down
PLA2R1	3.6741e-09	0.000137933	-1.73795	down
CLCN5	3.69429e-09	0.000138691	-1.14139	down
INPP5J	3.73497e-09	0.000140218	-1.45997	down
RHBG	3.85922e-09	0.000144883	-2.4655	down
CYP17A1	3.98691e-09	0.000149676	-1.75147	down
SLC44A4	4.00853e-09	0.000150488	-1.76566	down
MRO	4.07397e-09	0.000152945	-1.57549	down
FAM169A	4.10124e-09	0.000153969	-2.04041	down
TMEM61	4.3216e-09	0.000162242	-2.21758	down
PROM1	4.37334e-09	0.000164184	-1.894	down
DACH1	4.42946e-09	0.000166291	-1.74657	down
CDKN1C	4.50947e-09	0.000169294	-1.22819	down
SLC16A5	4.55748e-09	0.000171097	-1.80696	down
ECHS1	4.63031e-09	0.000173831	-1.71545	down
PLCD4	4.82925e-09	0.0001813	-1.39341	down
ETNK2	4.83856e-09	0.000181649	-1.37842	down
SLC13A3	4.89939e-09	0.000183933	-2.74666	down
SHISA3	5.02288e-09	0.000188569	-2.15164	down
TSPAN33	5.16771e-09	0.000194006	-1.38251	down
TNNT2	5.22149e-09	0.000196025	-2.12205	down
AGMAT	5.34252e-09	0.000200569	-1.85331	down
OXCT1	5.46933e-09	0.000205329	-1.47422	down
FAM171A1	5.6112e-09	0.000210656	-1.33718	down
COBLL1	5.72689e-09	0.000214999	-1.79006	down
ATP6V1B1	5.87429e-09	0.000220533	-2.40821	down
GGT6	6.13574e-09	0.000230348	-1.17099	down
MYH10	6.14758e-09	0.000230793	-1.37687	down
CHL1	6.17629e-09	0.00023187	-1.96551	down
CAPS	6.17859e-09	0.000231957	-1.05879	down
ATP6V0E2	6.17859e-09	0.000231957	-1.37399	down
TGFBR3	6.3356e-09	0.000237851	-1.20704	down
DPYS	6.40015e-09	0.000240275	-1.20258	down
LHPP	6.49592e-09	0.00024387	-1.2176	down
CTGF	6.59372e-09	0.000247542	-1.60581	down
HOXB8	6.9629e-09	0.000261401	-1.56382	down
LOC389332	7.44643e-09	0.000279554	-2.05907	down
TMEM174	7.97326e-09	0.000299332	-1.31205	down
SELENBP1	8.01964e-09	0.000301073	-1.33767	down
BSND	8.09719e-09	0.000303985	-2.6329	down
SLC5A12	8.24762e-09	0.000309632	-1.35534	down
AOX1	8.34073e-09	0.000313128	-1.34784	down
PRLR	8.41365e-09	0.000315865	-1.50837	down
NR1I3	8.49436e-09	0.000318895	-1.79252	down
C5	8.53495e-09	0.000320419	-1.19687	down
SUSD2	8.62512e-09	0.000323804	-1.58122	down
DDC	9.31888e-09	0.00034985	-1.98202	down
MT1X	9.33753e-09	0.000350549	-1.95754	down
PPM1H	9.38145e-09	0.000352198	-1.12274	down
PC	1.00147e-08	0.000375972	-1.10874	down
DDN	1.01656e-08	0.000381638	-1.46481	down
SLC4A11	1.02493e-08	0.00038478	-1.39969	down
GCAT	1.06342e-08	0.00039923	-1.25739	down
PIGR	1.0956e-08	0.000411308	-1.86095	down
TRIM2	1.10816e-08	0.000416024	-1.09738	down
GLOD5	1.11831e-08	0.000419835	-2.04216	down
MAL2	1.15969e-08	0.000435371	-2.58396	down
PANK1	1.16495e-08	0.000437346	-1.40631	down
LINC00473	1.20434e-08	0.000452135	-1.86084	down
SCNN1A	1.25749e-08	0.000472085	-3.00383	down
TRIM63	1.25749e-08	0.000472085	-1.67928	down
SORCS1	1.26311e-08	0.000474198	-1.34753	down
SLC7A9	1.28151e-08	0.000481106	-1.60134	down
NR0B2	1.32155e-08	0.000496137	-2.14988	down
ACAA1	1.33512e-08	0.00050123	-1.65989	down
RERGL	1.33822e-08	0.000502393	-2.16346	down
MARVELD3	1.33822e-08	0.000502393	-1.15157	down
ALDH8A1	1.34414e-08	0.000504618	-1.3787	down
RBP4	1.3488e-08	0.000506365	-1.38608	down
C1orf64	1.41081e-08	0.000529645	-1.71505	down
COLEC11	1.49962e-08	0.000562986	-1.26384	down
ARG2	1.57262e-08	0.000590393	-1.43691	down
STK33	1.59989e-08	0.00060063	-1.9243	down
SLC22A12	1.63355e-08	0.000613266	-1.40006	down
COL4A4	1.63453e-08	0.000613635	-1.55187	down
GLRX5	1.64856e-08	0.000618902	-1.13751	down
CA4	1.6792e-08	0.000630404	-1.51331	down
SPOCK1	1.70569e-08	0.00064035	-1.36962	down
NTNG1	1.72753e-08	0.00064855	-1.31488	down
GPM6B	1.75702e-08	0.000659621	-1.8036	down
GRB14	1.76261e-08	0.000661718	-1.59615	down
FOLR1	1.77192e-08	0.000665215	-1.14612	down
SLC26A4	1.79688e-08	0.000674586	-2.1109	down
FECH	1.80963e-08	0.000679373	-1.27763	down
SLC7A7	1.95779e-08	0.000734992	-1.36282	down
AGXT2	2.05203e-08	0.000770371	-1.24231	down
ATP12A	2.09282e-08	0.000785685	-2.06841	down
KLHL13	2.09282e-08	0.000785685	-1.53098	down
ESRP1	2.11029e-08	0.000792244	-1.18193	down
ADHFE1	2.11872e-08	0.000795408	-1.03341	down
QDPR	2.11872e-08	0.000795408	-1.27785	down
BMP7	2.14488e-08	0.000805231	-1.32723	down
ESRRG	2.14986e-08	0.000807099	-1.51091	down
RGN	2.28902e-08	0.000859345	-1.28898	down
NAPSA	2.29304e-08	0.000860854	-1.62435	down
EPB41L5	2.3076e-08	0.000866317	-1.41112	down
DNMT3L	2.33532e-08	0.000876726	-2.40545	down
LOC149703	2.33532e-08	0.000876726	-1.4416	down
RDH12	2.33532e-08	0.000876726	-1.72763	down
ARNT2	2.34512e-08	0.000880404	-1.00387	down
C9orf24	2.37359e-08	0.000891093	-1.50191	down
PLXNB1	2.38314e-08	0.00089468	-1.1754	down
MPPED2	2.46074e-08	0.000923812	-1.37787	down
AGXT	2.46591e-08	0.000925752	-1.71918	down
MAOA	2.48047e-08	0.000931218	-1.35326	down
PFN2	2.63265e-08	0.00098835	-1.35823	down
PAK6	2.67267e-08	0.00100337	-1.60014	down
SUCLG1	2.68508e-08	0.00100803	-2.17892	down
BPHL	2.69647e-08	0.00101231	-1.55001	down
PHYH	2.73837e-08	0.00102804	-1.14412	down
BEX1	2.74913e-08	0.00103208	-1.35337	down
GLYAT	2.7689e-08	0.0010395	-1.56608	down
SLC7A13	2.7689e-08	0.0010395	-1.062	down
COCH	2.84287e-08	0.00106727	-1.47872	down
CLDN16	2.86787e-08	0.00107666	-1.03312	down
GC	2.94394e-08	0.00110521	-1.39876	down
SLC16A10	2.96043e-08	0.00111141	-1.2092	down
C1orf116	2.97192e-08	0.00111572	-1.95401	down
PBX1	2.98344e-08	0.00112004	-1.05725	down
SHISA2	2.995e-08	0.00112438	-1.00722	down
FOXI1	3.02337e-08	0.00113503	-1.45136	down
PLAT	3.04162e-08	0.00114188	-1.39076	down
GABARAPL1	3.33418e-08	0.00125172	-1.54538	down
PALM	3.33418e-08	0.00125172	-1.32105	down
NAP1L2	3.34886e-08	0.00125723	-1.90864	down
DHDH	3.37735e-08	0.00126793	-1.54268	down
SUCLG2	3.39799e-08	0.00127567	-1.37927	down
ARSF	3.4238e-08	0.00128536	-1.24942	down
NOX4	3.4238e-08	0.00128536	-1.55572	down
BCKDHB	3.44977e-08	0.00129511	-1.14038	down
PAQR5	3.5022e-08	0.0013148	-1.35677	down
ITLN1	3.52867e-08	0.00132473	-1.60942	down
GPHN	3.52867e-08	0.00132473	-1.02456	down
EPCAM	3.55244e-08	0.00133366	-2.48684	down
C15orf59	3.62261e-08	0.00136	-1.95686	down
SLC22A13	3.88817e-08	0.0014597	-1.49119	down
SLC7A8	3.92435e-08	0.00147328	-1.39216	down
L2HGDH	3.99e-08	0.00149793	-1.19515	down
SLC23A1	3.99e-08	0.00149793	-1.38339	down
OAT	4.0641e-08	0.00152574	-1.25428	down
ACSM3	4.18503e-08	0.00157114	-1.14839	down
ERVMER34-1	4.29199e-08	0.0016113	-1.73316	down
G0S2	4.29329e-08	0.00161179	-1.07252	down
HACL1	4.37204e-08	0.00164135	-1.10581	down
TOX3	4.4323e-08	0.00166398	-1.15419	down
GGH	4.53992e-08	0.00170438	-1.14139	down
CLSTN2	4.54953e-08	0.00170799	-1.23859	down
LOC100130691	4.66558e-08	0.00175155	-1.02159	down
C21orf62	4.78408e-08	0.00179604	-1.50705	down
TM7SF2	4.8184e-08	0.00180892	-1.24182	down
BHMT	4.87536e-08	0.00183031	-1.23515	down
NQO2	4.97536e-08	0.00186785	-1.28031	down
APEH	5.04648e-08	0.00189455	-1.19067	down
C8orf4	5.06439e-08	0.00190127	-1.51412	down
HIBCH	5.08236e-08	0.00190802	-1.29756	down
PRAP1	5.1497e-08	0.0019333	-1.1582	down
SCIN	5.15474e-08	0.00193519	-1.41397	down
SULT1C2	5.19126e-08	0.0019489	-1.09607	down
PLA2G4F	5.24644e-08	0.00196962	-1.39103	down
C9orf66	5.27098e-08	0.00197883	-1.37574	down
SUSD3	5.33948e-08	0.00200455	-1.11266	down
IRX1	5.51043e-08	0.00206873	-1.21444	down
KCNE1	5.56842e-08	0.0020905	-1.00182	down
ANGPTL1	5.64859e-08	0.00212059	-1.87747	down
SDSL	5.6662e-08	0.0021272	-1.1202	down
SLC39A5	5.69185e-08	0.00213683	-1.24389	down
RASSF10	6.09318e-08	0.0022875	-1.70938	down
MUC1	6.28339e-08	0.00235891	-1.50301	down
ZMYND12	6.34807e-08	0.00238319	-1.33779	down
PHGDH	6.61406e-08	0.00248305	-1.28735	down
VDR	6.88581e-08	0.00258507	-1.25204	down
SLC4A1	7.06617e-08	0.00265278	-1.30041	down
RHOBTB3	7.26497e-08	0.00272741	-1.68054	down
EMX1	7.26497e-08	0.00272741	-1.22297	down
APCDD1L	7.28923e-08	0.00273652	-1.10954	down
MPP7	7.58571e-08	0.00284783	-1.36689	down
FAM167A	7.63608e-08	0.00286674	-2.1008	down
QPRT	7.76247e-08	0.00291419	-1.41865	down
EPHX2	7.81822e-08	0.00293511	-1.3062	down
NEDD4L	7.84038e-08	0.00294344	-1.18361	down
C3orf52	7.86623e-08	0.00295314	-1.39287	down
LUM	7.89216e-08	0.00296287	-1.9502	down
C2orf40	8.15946e-08	0.00306323	-1.39347	down
PROM2	8.26266e-08	0.00310197	-2.84808	down
FAM46B	8.31675e-08	0.00312228	-1.17515	down
DUSP26	8.34391e-08	0.00313247	-2.18687	down
DNASE1L3	8.56383e-08	0.00321503	-1.48765	down
KL	8.9397e-08	0.00335614	-1.25728	down
GABRA2	9.07638e-08	0.00340746	-1.94447	down
GPT2	9.07638e-08	0.00340746	-1.24777	down
BEX2	9.4487e-08	0.00354723	-1.62949	down
ST3GAL6	9.46224e-08	0.00355231	-1.14077	down
PLAU	9.61424e-08	0.00360938	-1.14344	down
AUH	9.89297e-08	0.00371402	-1.30054	down
GCGR	9.91283e-08	0.00372147	-2.55009	down
MYL3	9.98736e-08	0.00374946	-1.04814	down
SHROOM3	1.09688e-07	0.00411789	-1.87501	down
IRF6	1.11799e-07	0.00419716	-1.46849	down
CTH	1.12495e-07	0.00422328	-1.09725	down
KIT	1.14959e-07	0.00431578	-1.13499	down
RAP1GAP	1.16746e-07	0.00438288	-1.44507	down
PARM1	1.18766e-07	0.00445871	-1.125	down
LRRC2	1.20336e-07	0.00451764	-1.46243	down
SLC26A7	1.25144e-07	0.00469817	-1.19932	down
PPARGC1A	1.26781e-07	0.00475961	-1.7744	down
KANK4	1.29133e-07	0.00484792	-1.01174	down
HIGD1A	1.30105e-07	0.00488442	-1.61133	down
GRHL2	1.30706e-07	0.00490698	-2.13281	down
SVOPL	1.31102e-07	0.00492184	-1.94646	down
PTPN13	1.34709e-07	0.00505726	-1.00319	down
CYFIP2	1.37572e-07	0.00516472	-1.22145	down
LAD1	1.40498e-07	0.00527459	-1.40443	down
SLC27A2	1.41394e-07	0.0053082	-1.51052	down
CPNE6	1.43022e-07	0.00536934	-1.30497	down
TRPM6	1.45598e-07	0.00546604	-1.09801	down
GJB1	1.46031e-07	0.00548229	-1.26234	down
TSPAN1	1.47774e-07	0.00554772	-1.40947	down
SPTBN2	1.47774e-07	0.00554772	-1.02628	down
AK3	1.49092e-07	0.00559721	-1.25243	down
NDUFA4	1.57672e-07	0.00591931	-1.31488	down
CHODL	1.59063e-07	0.00597155	-1.95264	down
FLRT3	1.68604e-07	0.00632975	-1.33203	down
CHRDL1	1.74649e-07	0.00655669	-1.47734	down
TMEM125	1.75058e-07	0.00657203	-1.00109	down
ARL4D	1.78618e-07	0.00670567	-1.35313	down
BMPR1B	1.83637e-07	0.0068941	-1.76646	down
SCNN1B	1.83637e-07	0.0068941	-1.17648	down
TMPRSS4	1.84421e-07	0.00692354	-1.91148	down
ZDHHC2	1.91283e-07	0.00718115	-1.14562	down
ACADM	1.95115e-07	0.00732501	-1.43901	down
CMTM4	1.96952e-07	0.00739398	-1.12856	down
SUSD4	2.00485e-07	0.00752661	-1.92957	down
SLC28A2	2.02401e-07	0.00759855	-1.27061	down
EIF1B	2.12863e-07	0.00799131	-1.01479	down
AKR7A3	2.13874e-07	0.00802927	-1.26258	down
ERBB4	2.30608e-07	0.0086575	-2.1885	down
MRAP2	2.41415e-07	0.0090632	-1.20605	down
ERMP1	2.50368e-07	0.00939933	-1.48258	down
CNDP1	2.55162e-07	0.00957929	-1.33487	down
PNMAL1	2.60734e-07	0.00978848	-1.01928	down
ALDH1A2	2.6285e-07	0.0098679	-1.36579	down
GALM	2.70208e-07	0.0101441	-1.20831	down
GPD1	2.76282e-07	0.0103722	-1.36302	down
SLC25A5	2.7936e-07	0.0104877	-1.49882	down
NAT8B	2.84028e-07	0.010663	-1.31504	down
PGAM2	2.8708e-07	0.0107775	-1.59023	down
SLC25A10	2.9355e-07	0.0110205	-1.13848	down
GK	2.94779e-07	0.0110666	-1.25636	down
ACSM2B	2.98406e-07	0.0112028	-1.16924	down
CXCL12	3.00039e-07	0.0112641	-1.43073	down
EPN3	3.03447e-07	0.011392	-1.22057	down
RASD1	3.11509e-07	0.0116947	-1.28032	down
DCDC2	3.11669e-07	0.0117007	-1.49278	down
CTDSPL	3.14784e-07	0.0118176	-1.00283	down
PRR15	3.2088e-07	0.0120465	-1.16675	down
MAGI2-AS3	3.25399e-07	0.0122161	-1.29744	down
TMEM30B	3.27321e-07	0.0122883	-1.10881	down
ENOX1	3.29878e-07	0.0123843	-1.2281	down
PTGER1	3.35041e-07	0.0125781	-2.64236	down
ALDH1B1	3.41149e-07	0.0128074	-1.17897	down
MME	3.43235e-07	0.0128857	-1.09041	down
SLC16A7	3.58059e-07	0.0134422	-1.36789	down
CKMT2	3.63748e-07	0.0136558	-1.72186	down
PACRG	3.71445e-07	0.0139448	-1.22884	down
LOC400043	3.83234e-07	0.0143874	-1.1299	down
PLLP	3.97423e-07	0.01492	-1.10699	down
CYP1B1	3.98422e-07	0.0149576	-1.41104	down
MOGAT1	4.01434e-07	0.0150706	-1.36454	down
CNGA1	4.03452e-07	0.0151464	-1.07597	down
TPD52L1	4.07707e-07	0.0153062	-2.12323	down
F3	4.20403e-07	0.0157828	-1.83903	down
IL13RA2	4.23049e-07	0.0158821	-1.38112	down
BDKRB2	4.24705e-07	0.0159443	-1.11549	down
KCNJ15	4.24705e-07	0.0159443	-1.09858	down
ACO1	4.30466e-07	0.0161606	-1.21904	down
DNASE1	4.33413e-07	0.0162712	-2.76907	down
NKIRAS1	4.46742e-07	0.0167716	-1.12794	down
ATP1A1	4.62704e-07	0.0173708	-1.20917	down
ACOT11	4.67347e-07	0.0175451	-1.30641	down
MUC13	4.79117e-07	0.017987	-1.1286	down
HOGA1	4.81499e-07	0.0180765	-1.08233	down
APOO	4.96198e-07	0.0186282	-1.07043	down
TJP3	5.23223e-07	0.0196428	-1.05665	down
ACSM2A	5.33752e-07	0.0200381	-1.28311	down
ACOT12	5.58057e-07	0.0209506	-1.55541	down
DPT	5.60712e-07	0.0210502	-1.19101	down
SERPINA4	5.68301e-07	0.0213352	-1.46956	down
CASR	5.82055e-07	0.0218515	-1.70432	down
PCDH9	6.04613e-07	0.0226984	-1.9646	down
ACAT1	6.0465e-07	0.0226998	-1.68279	down
SLC23A3	6.07481e-07	0.022806	-1.34755	down
ASAP3	6.08913e-07	0.0228598	-1.00321	down
MOXD1	6.43921e-07	0.0241741	-1.68888	down
PCCB	6.45415e-07	0.0242302	-1.52996	down
DIRAS3	6.5182e-07	0.0244706	-1.48906	down
SPATA17	6.54442e-07	0.0245691	-1.09011	down
GDPD3	6.82787e-07	0.0256332	-1.07859	down
UQCRC1	6.83723e-07	0.0256683	-1.03394	down
ANO5	7.00826e-07	0.0263104	-1.88655	down
COL4A3	7.08397e-07	0.0265946	-1.2403	down
RNF43	7.09221e-07	0.0266256	-1.0641	down
CRYL1	7.1084e-07	0.0266864	-1.20467	down
COL4A6	7.18196e-07	0.0269625	-1.35486	down
UGT3A1	7.21486e-07	0.027086	-1.21298	down
SEMA6D	7.58478e-07	0.0284748	-1.29506	down
ANGPTL3	7.66094e-07	0.0287607	-1.30262	down
RPS6KA6	7.8632e-07	0.02952	-1.25073	down
MARVELD2	7.8698e-07	0.0295448	-1.17116	down
BBOX1	8.00382e-07	0.0300479	-1.22891	down
MPP5	8.14972e-07	0.0305957	-1.13262	down
IGSF11	8.35806e-07	0.0313778	-1.21011	down
BEX4	8.67112e-07	0.0325531	-1.23474	down
SLC25A25	8.74773e-07	0.0328407	-1.11309	down
SLC17A1	8.98081e-07	0.0337157	-1.86881	down
GRHPR	9.1086e-07	0.0341955	-1.04218	down
MYOZ1	9.14853e-07	0.0343454	-1.26819	down
LINGO2	9.33005e-07	0.0350269	-1.34613	down
CAND2	9.41169e-07	0.0353334	-1.19772	down
TRNP1	9.45272e-07	0.0354874	-1.30802	down
FBXO2	9.45272e-07	0.0354874	-1.05172	down
CA2	9.50281e-07	0.0356754	-1.31055	down
SLC25A33	9.96316e-07	0.0374037	-1.14818	down
CNTN1	1.04163e-06	0.039105	-1.2277	down
CHP2	1.04834e-06	0.0393567	-2.07392	down
LIPH	1.08914e-06	0.0408884	-1.4463	down
NKAIN4	1.10562e-06	0.0415072	-1.18923	down
OVOL2	1.11502e-06	0.0418602	-2.26196	down
TBC1D24	1.12449e-06	0.0422157	-1.1285	down
UQCRFS1	1.14044e-06	0.0428143	-1.2845	down
CHDH	1.14997e-06	0.0431721	-1.09923	down
EYA4	1.15476e-06	0.0433519	-1.07871	down
KCNJ13	1.18873e-06	0.0446273	-1.96758	down
FMO1	1.23864e-06	0.046501	-1.15214	down
EMCN	1.25393e-06	0.0470752	-1.1207	down
ENPP1	1.26689e-06	0.0475615	-1.07028	down
CCBE1	1.29546e-06	0.0486341	-1.87256	down
